# Supplementary figures and images for: HPLC Quantitative Analysis of Main Stilbenes and Flavones in Different Parts of Matteuccia struthiopteris
Source: Hindawi journal article supplement (doi:10.1155/2013/452610), 2013-01-01

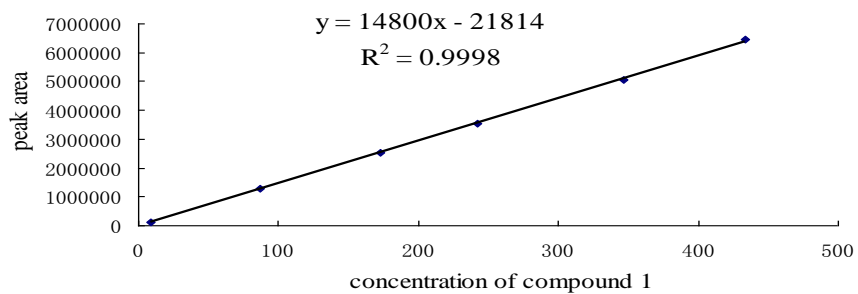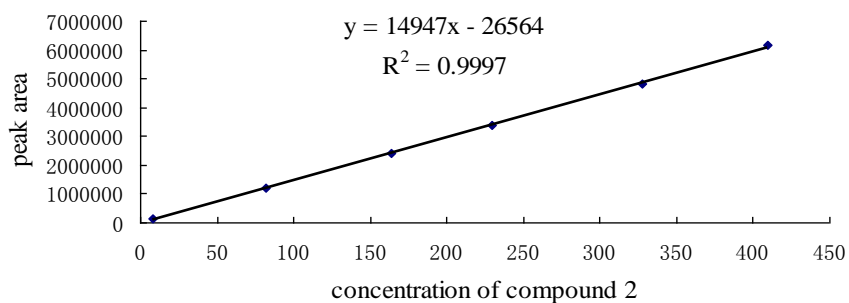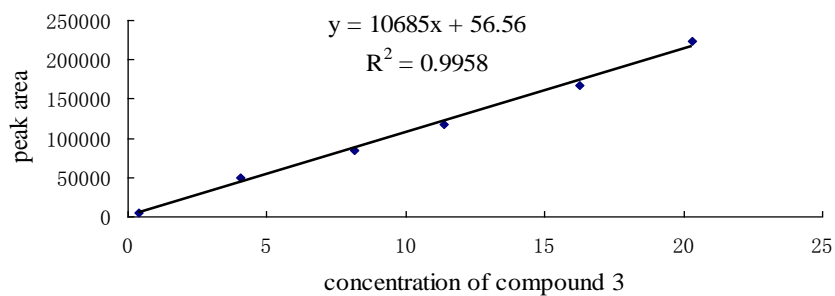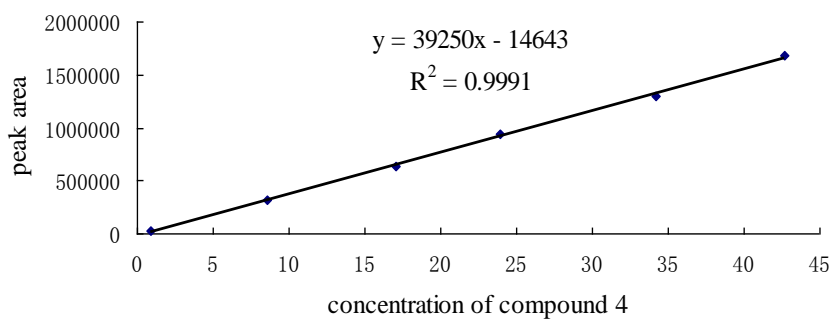

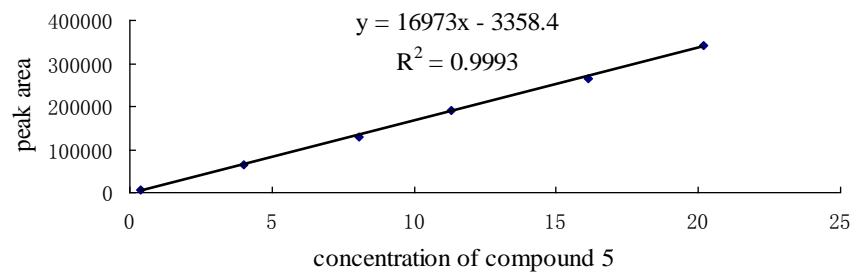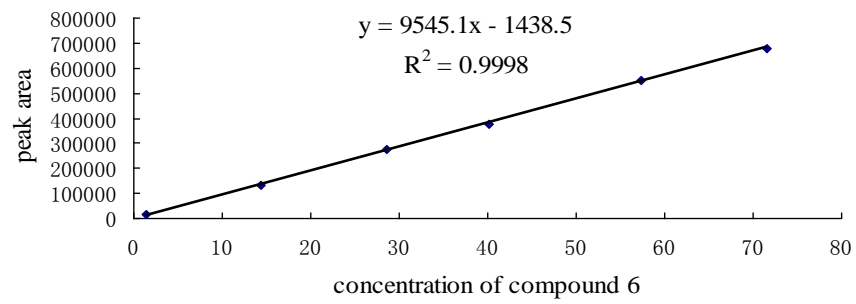

**Fig. 3.** Calibration curves of compounds 1-6

Supplement: f1 [file 452610.f1.pdf]
